# Supplementary material
Source: Springer Nature journal article supplement (https://www.springermedizin.de/resource/supplementary/12916_2012_712_MOESM6_ESM.pdf/9598728)

CD20

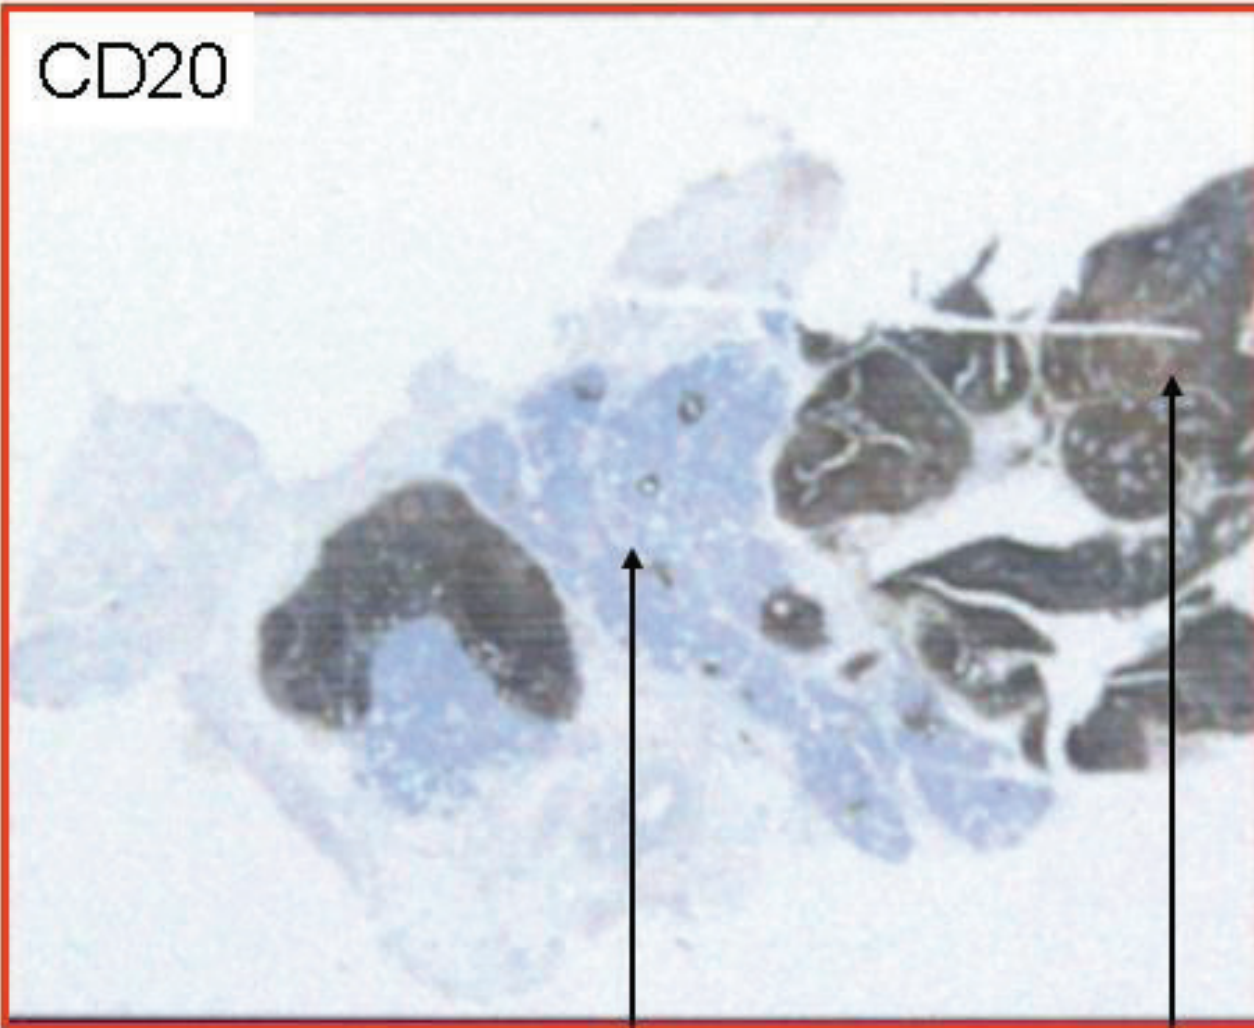

**Lymphoma-free  
parenchyma**

**Parenchyma  
infiltrated by  
lymphoma**

CD20

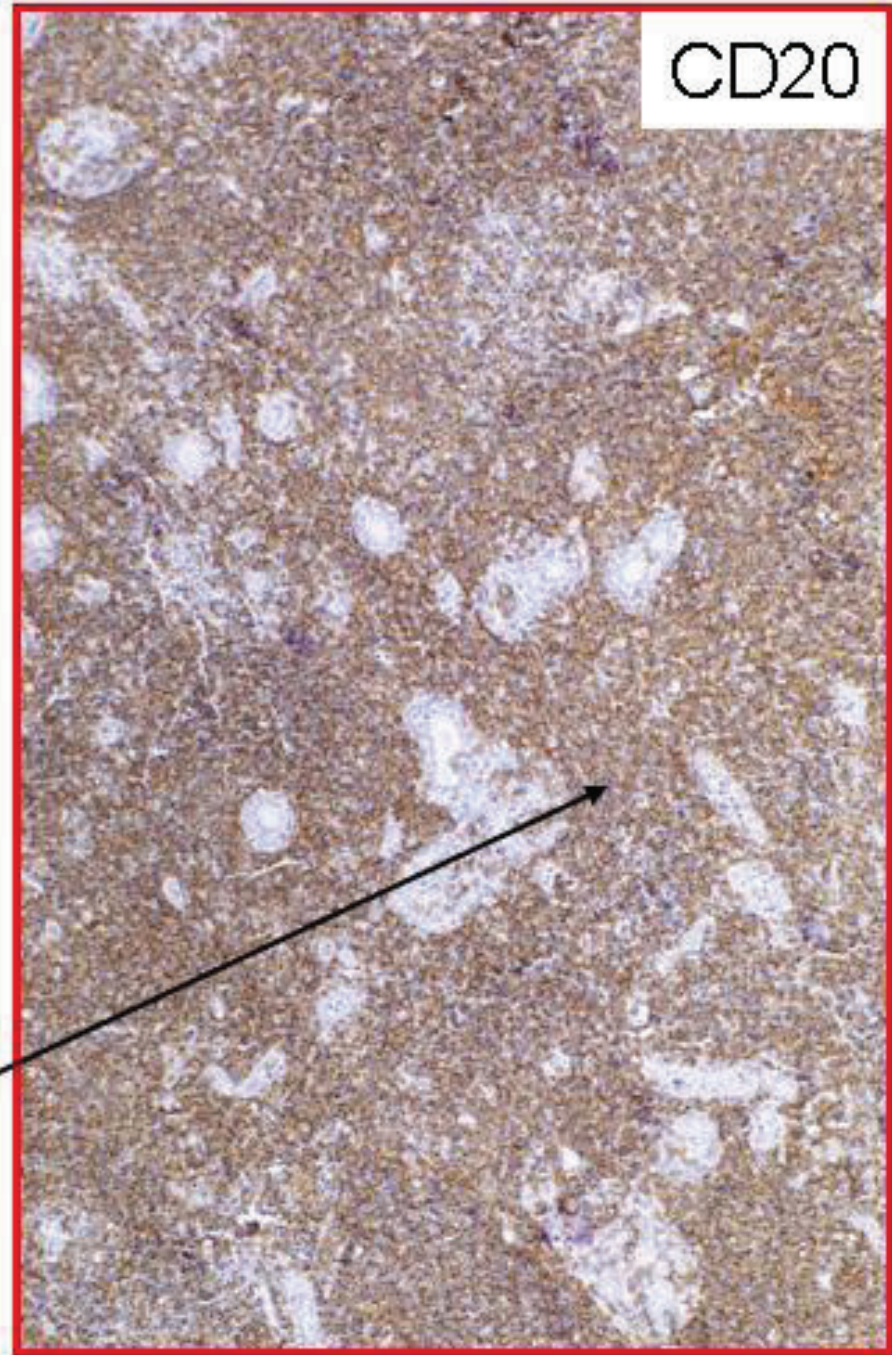

Supplement: MOESM6 [file 9598728]
